# Supplementary material for: Impact of Outdoor Air Pollution on Indoor Air Quality in Low-Income Homes during Wildfire Seasons
Source: PubMed Central journal article supplement (PMC6801919; doi:10.3390/ijerph16193535), 2019-09-21
Supplement: ijerph-16-03535-s001.pdf [file ijerph-16-03535-s001.pdf]

Supplementary Materials:

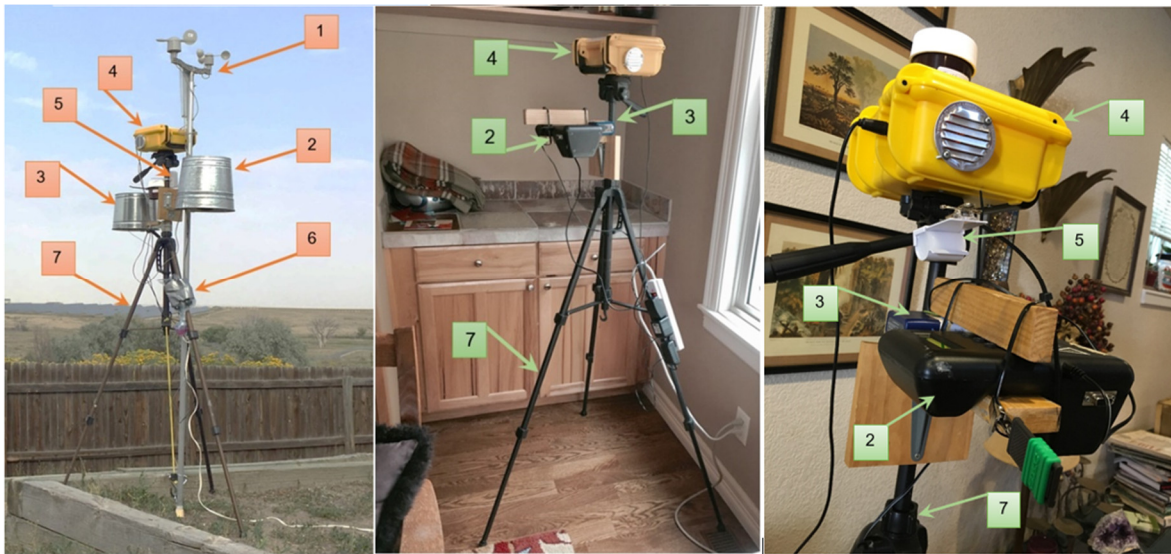

**Figure S1.** Outdoor instrument rig (Left) and Indoor Instrument rig (Middle and Right). [Legend for labels: 1 = Weather station; 2 = Dylos-1700 Monitor (outdoor instrument covered with metallic bucket); 3 = microAeth AE51 Aethalometer (outdoor instrument covered with metallic bucket); 4 = Y-pod; 5 = Ogawa NO<sub>2</sub> passive sampler; 6 = weather-protected electrical connection point; 7 = tripod stand.]

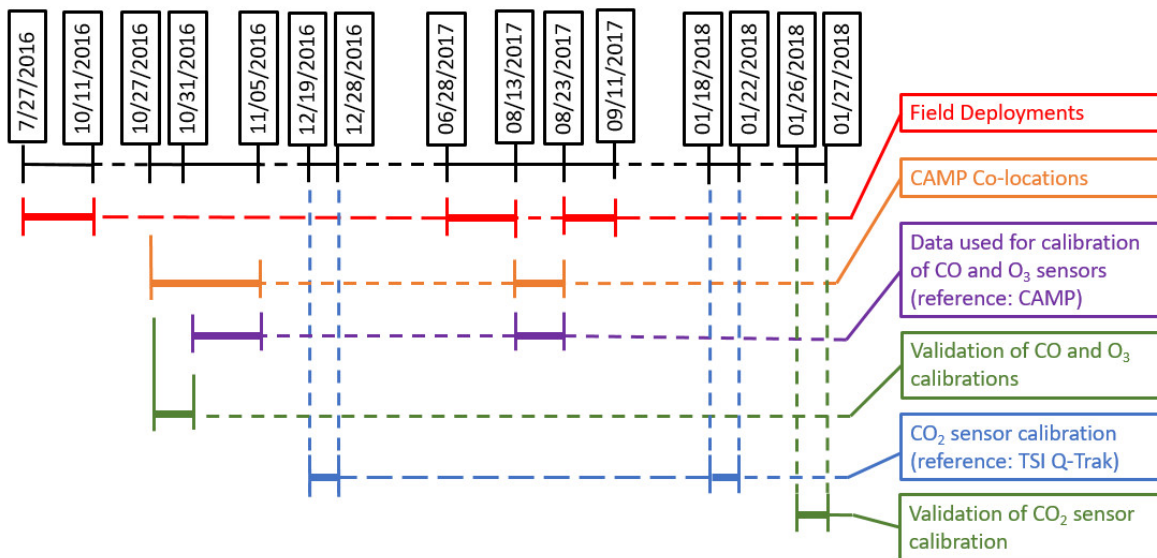

**Figure S2.** Schematic showing timeline of instrument deployment periods, sensor calibration periods for Y-Pods and validation periods for sensor calibrations. CO<sub>2</sub> data were calibrated using TSI Q-Trak as the reference instrument, but the data showed poor results during validation and, hence, CO<sub>2</sub> data were discarded.

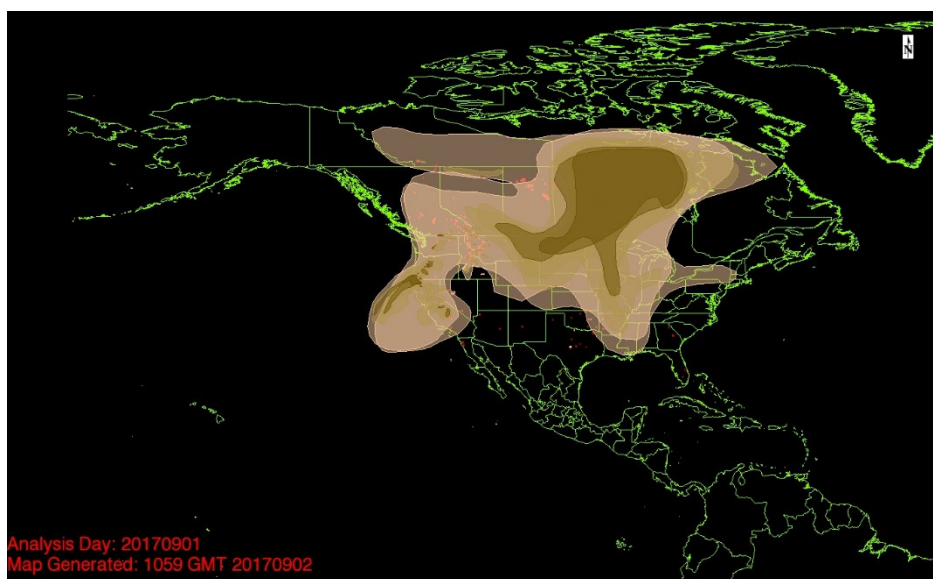

(a)

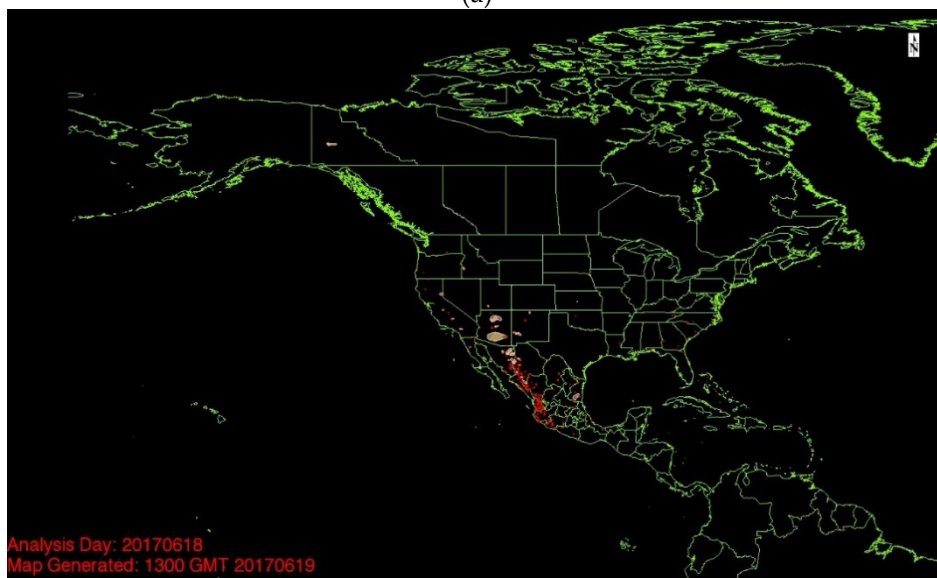

(b)

**Figure S3.** Example of National Oceanic and Atmospheric Administration’s Hazard Mapping System (NOAA HMS) remote sensing data showing a day with plume cover (a) and no plume cover (b) over the state of Colorado.

**Table S1.** Cross-tabulation of indoor and outdoor temperature and relative humidity with various home characteristics (raw dataset). Total  $N = 28$ .

|                            | $n$ (% of Total) | Temperature (°C)                             |           | Relative Humidity (%)                        |           |
|----------------------------|------------------|----------------------------------------------|-----------|----------------------------------------------|-----------|
|                            |                  | Indoor Median (Range)/Outdoor Median (Range) | I/O Ratio | Indoor Median (Range)/Outdoor Median (Range) | I/O Ratio |
| Location                   |                  |                                              |           |                                              |           |
| Aurora                     | 4 (14.3)         | 27.3 (21.2–33.8) /<br>23.5 (10.9–46.8)       | 1.16      | 34.92 (25.3–46.4) /<br>41.6 (9.22–81.9)      | 0.84      |
| Boulder/<br>Longmont       | 9 (32.1)         | 23.2 (18.9–30.2) /<br>16.8 (1.4–41.1)        | 1.38      | 30.9 (13.7–55.0) /<br>35.3 (9.10–88.5)       | 0.87      |
| West Denver                | 11 (39.3)        | 26.4 (17.1–34.0) /<br>21.4 (1.70–45.7)       | 1.23      | 34.8 (14.6–61.2) /<br>37.7 (6.57–86.0)       | 0.92      |
| Central/North<br>Denver    | 4 (14.3)         | 26.4 (19.7–30.0) /<br>20.9 (9.79–44.4)       | 1.26      | 34.1 (19.7–60.0) /<br>42.5 (7.11–84.4)       | 0.80      |
| Building Type <sup>†</sup> |                  |                                              |           |                                              |           |
| BG                         | 5 (17.9)         | 22.4 (18.9–30.16) /<br>12.9 (1.4–39.1)       | 1.74      | 26.6 (13.7–46.7) /<br>29.4 (9.10–83.2)       | 0.90      |
| EER                        | 13 (46.4)        | 27.1 (17.1–34.0) /<br>22.2 (1.69–46.8)       | 1.22      | 34.6 (14.6–55.0) /<br>39.9 (6.57–88.5)       | 0.87      |
| Non-EER                    | 10 (35.7)        | 25.7 (19.74–31.1) /<br>21.6 (9.79–44.4)      | 1.19      | 40.6 (14.8–61.7) /<br>43.1 (7.11–86.0)       | 0.94      |
| Road Proximity             |                  |                                              |           |                                              |           |
| <100 m                     | 15 (53.6)        | 25.3 (19.5–33.8) /<br>19.6 (1.56–44.4)       | 1.29      | 34.1 (14.5–61.7) /<br>39.4 (7.11–86.0)       | 0.86      |
| 100–200 m                  | 7 (25.0)         | 26.7 (17.1–34.4) /<br>22.6 (1.69–46.8)       | 1.18      | 35.2 (15.3–55.0) /<br>39.1 (7.54–88.5)       | 0.90      |
| >200 m                     | 6 (21.4)         | 25.4 (19.0–32.2) /<br>17.8 (1.4–44.8)        | 1.43      | 31.1 (13.7–44.0) /<br>34.9 (6.57–83.5)       | 0.89      |
| Wildfire Plume Density     |                  |                                              |           |                                              |           |
| None                       | 10 (35.7)        | 22.7 (17.1–34.0) /<br>16.5 (1.40–46.7)       | 1.37      | 31.1 (13.7–55.0) /<br>34.5 (9.10–88.5)       | 0.90      |
| Low                        | 6 (21.4)         | 26.7 (19.8–32.0) /<br>22.8 (9.79–45.7)       | 1.17      | 36.7 (14.7–59.8) /<br>40.1 (6.62–84.4)       | 0.91      |
| Medium                     | 9 (32.1)         | 26.5 (20.1–32.2) /<br>21.6 (10.6–44.7)       | 1.23      | 36.8 (14.6–61.7) /<br>41.8 (6.57–86.0)       | 0.88      |
| High                       | 3 (10.7)         | 24.5 (21.2–29.5) /<br>21.5 (10.9–39.1)       | 1.14      | 40.4 (22.9–46.7) /<br>35.5 (9.26–71.1)       | 1.14      |
| Mechanical Ventilation     |                  |                                              |           |                                              |           |
| Present                    | 5 (17.9)         | 23.5 (19.5–34.0) /<br>17.8 (1.56–44.7)       | 1.32      | 28.5 (14.5–47.5) /<br>36.9 (10.3–88.5)       | 0.77      |
| Absent                     | 23 (82.1)        | 26.0 (17.1–33.8) /<br>20.5 (1.40–46.8)       | 1.27      | 34.7 (13.7–61.7) /<br>38.1 (6.57–86.0)       | 0.91      |
| Hours Windows Open         |                  |                                              |           |                                              |           |
| 0                          | 3 (10.7)         | 24.7 (19.9–28.3) /<br>18.4 (1.56–40.9)       | 1.34      | 31.7 (16.1–44.3) /<br>44.8 (12.9–88.5)       | 0.71      |
| 1–6                        | 4 (14.3)         | 26.0 (17.1–33.0) /<br>21.4 (1.69–46.8)       | 1.21      | 34.0 (15.3–55.0) /<br>36.1 (7.54–84.4)       | 0.94      |
| 7–12                       | 5 (17.9)         | 22.8 (19.0–29.5) /<br>16.8 (2.64–41.5)       | 1.36      | 32.6 (13.7–53.9) /<br>36.4 (9.10–83.5)       | 0.89      |
| >12                        | 16 (57.1)        | 26.2 (19.0–34.0) /<br>21.4 (1.40–44.8)       | 1.22      | 34.6 (14.6–61.7) /<br>38.1 (6.57–86.0)       | 0.91      |

| Gas Stoves       |           |                                        |      |                                        |      |
|------------------|-----------|----------------------------------------|------|----------------------------------------|------|
| Present          | 5 (17.9)  | 26.0 (19.8–31.0) /<br>21.1 (9.79–42.0) | 1.23 | 40.8 (14.8–61.7) /<br>41.2 (7.11–86.0) | 0.99 |
| Absent           | 23 (82.1) | 25.6 (17.1–34.0) /<br>19.7 (1.40–46.8) | 1.30 | 33.4 (13.7–55.0) /<br>37.5 (6.57–88.5) | 0.89 |
| Stove Hood Types |           |                                        |      |                                        |      |
| Exhaust          | 8 (28.6)  | 23.9 (17.1–29.5) /<br>17.6 (1.56–41.1) | 1.36 | 34.0 (15.3–52.1) /<br>41.0 (9.07–84.4) | 0.83 |
| Recirculating    | 13 (46.4) | 25.7 (18.9–34.0) /<br>20.4 (1.4–46.75) | 1.26 | 34.4 (13.7–61.7) /<br>35.3 (6.62–86.0) | 0.97 |
| Absent           | 7 (25.0)  | 27.1 (19.7–32.2) /<br>21.5 (9.79–44.7) | 1.26 | 32.6 (14.6–59.9) /<br>39.8 (6.57–88.5) | 0.82 |

<sup>†</sup>BG = Built Green; EER = Energy Efficiency Retrofitted; Non-EER = Non-Energy Efficiency Retrofitted (conventional homes as a control group).  
I/O ratios across all categories were statistically significant at  $\alpha = 0.05$  (K-W test).

**Table S2.** Concentration comparisons between indoor and outdoor pollutants before and after data filtration.

|                                                 | Concentrations     |                    |                                    |
|-------------------------------------------------|--------------------|--------------------|------------------------------------|
|                                                 | Raw data           | Filtered data      | p <sub>2</sub> -value <sup>3</sup> |
| <b>PN<sub>0.5-2.5</sub> [# /cm<sup>3</sup>]</b> |                    |                    |                                    |
| Indoor                                          | 1.40 (0–203)       | 1.17 (0.0494–199)  | <0.000                             |
| Outdoor                                         | 1.66 (0.0850–79.1) | 1.69 (0.0850–79.1) | <0.000                             |
| r <sub>s</sub> <sup>1</sup>                     | 0.311              | 0.374              |                                    |
| p <sub>1</sub> -value <sup>2</sup>              | <0.000             | <0.000             |                                    |
| <b>BC [ng/m<sup>3</sup>]</b>                    |                    |                    |                                    |
| Indoor                                          | 532 (82.2–15900)   | 512 (82.2–5081)    | <0.000                             |
| Outdoor                                         | 768 (54.5–39100)   | 766 (54.5–39100)   | 0.629                              |
| r <sub>s</sub>                                  | 0.507              | 0.525              |                                    |
| p <sub>1</sub> -value                           | <0.000             | <0.000             |                                    |
| <b>CO [ppm]</b>                                 |                    |                    |                                    |
| Indoor                                          | 0.485 (0–28.2)     | 0.450 (0–10.5)     | <0.000                             |
| Outdoor                                         | 0.150 (0–14.9)     | 0.144 (0–14.0)     | 0.000467                           |
| r <sub>s</sub>                                  | 0.434              | 0.252              |                                    |
| p <sub>1</sub> -value                           | <0.000             | <0.000             |                                    |

<sup>1</sup> Spearman’s rank correlation coefficient between indoor and outdoor medians.

<sup>2</sup> p-values for K-W test between indoor and outdoor medians.

<sup>3</sup> p-values for Wilcoxon Mann–Whitney (U) test between raw and filtered dataset medians (K-W test could not be performed due to different lengths of datasets).

\*\* High value signifying outlier.



|                           |                                          |                    |                                       |                    |                                    |                    |                                           |                    |
|---------------------------|------------------------------------------|--------------------|---------------------------------------|--------------------|------------------------------------|--------------------|-------------------------------------------|--------------------|
| Present                   | 1.30 (0.198–201)/<br>1.30 (0.131–78.7)   | 4/<br><b>1.00</b>  | 480 (98.3–15900)/<br>623 (98.3–6290)  | 3/<br><b>0.77</b>  | 0.333 (0–4.46)/<br>0.0258 (0–7.88) | 5/<br><b>12.8</b>  | 6.73 (3.58–<br>8.06)/<br>5.56 (5.21–6.95) | 3/<br>1.21         |
| Absent                    | 1.43 (0–203)/<br>1.75 (0.0847–79.1)      | 22/<br><b>0.82</b> | 557 (82.2–14300)/<br>793 (54.5–39100) | 16/<br><b>0.70</b> | 0.539 (0–28.2)/<br>0.173 (0–14.9)  | 22/<br><b>3.11</b> | 9.99 (5.04–<br>26.8)/<br>9.40 (4.48–20.6) | 16/<br>1.06        |
| p-values:                 |                                          | <0.01              |                                       | <0.01              |                                    | <0.01              |                                           | 0.65               |
| <b>Hours Windows Open</b> |                                          |                    |                                       |                    |                                    |                    |                                           |                    |
| 0                         | 1.19 (0.314–36.8)/<br>1.57 (0.131–54.0)  | 3/<br><b>0.76</b>  | 250 (98.9–6360)/<br>740 (54.4–39100)  | 2/<br><b>0.34</b>  | 0.466 (0–3.23)/<br>0.0742 (0–7.88) | 3/<br><b>6.28</b>  | 5.06 (3.58–<br>6.53)/<br>7.40 (5.56–9.23) | 2/<br><b>0.68</b>  |
| 1–6                       | 0.611 (0.05–20.9)/<br>1.50 (0.159–79.1)  | 4/<br><b>0.41</b>  | 316 (82.2–2120)/<br>540 (97.0–6950)   | 4/<br><b>0.58</b>  | 0.713 (0–4.91)/<br>0.252 (0–3.01)  | 4/<br><b>2.83</b>  | 7.20 (5.04–<br>8.62)/<br>6.01 (4.48–7.78) | 4/<br><b>1.20</b>  |
| 7–12                      | 1.24 (0.0989–160)/<br>1.41 (0.0848–78.7) | 5/<br><b>0.88</b>  | 406 (109–3000)/<br>800 (119–21500)    | 2/<br><b>0.51</b>  | 0.322 (0–10.5)/<br>0 (0–14.0)      | 5/<br>–            | 20.2 (13.6–<br>26.8)/<br>8.48 (6.07–10.9) | 2/<br><b>2.38</b>  |
| > 12                      | 1.80 (0–203)/<br>1.82 (0.120–59.2)       | 14/<br><b>0.99</b> | 761 (83.3–15900)/<br>860 (58.0–17800) | 11/<br><b>0.88</b> | 0.477 (0–28.2)/<br>0.179 (0–14.9)  | 15/<br><b>2.66</b> | 10.1 (6.48–<br>25.5)/<br>9.58 (5.21–20.6) | 11/<br><b>1.05</b> |
| p-values:                 |                                          | <0.01              |                                       | <0.01              |                                    | <0.01              |                                           | 0.035              |
| <b>Gas Stove</b>          |                                          |                    |                                       |                    |                                    |                    |                                           |                    |
| Present                   | 1.65 (0–203)/<br>1.97 (0.275–59.2)       | 5/<br><b>0.84</b>  | 597 (109–4400)/<br>858 (119–21500)    | 3/<br><b>0.70</b>  | 0.736 (0–12.9)/<br>0.142 (0–1.23)  | 4/<br><b>5.18</b>  | 25.5 (13.6–<br>26.8)/<br>10.9 (6.07–11.6) | 3/<br><b>2.34</b>  |
| Absent                    | 1.33 (0.0494–201)/<br>1.58 (0.0848–79.1) | 21/<br><b>0.84</b> | 522 (82.2–15900)/<br>748 (54.5–39100) | 16/<br><b>0.70</b> | 0.435 (0–28.2)/<br>0.151 (0–14.9)  | 23/<br><b>2.88</b> | 8.34 (3.58–<br>13.8)/<br>8.51 (4.48–20.6) | 16/<br><b>0.98</b> |
| p-values:                 |                                          | <0.01              |                                       | <0.01              |                                    | <0.01              |                                           | 0.007              |
| <b>Stove Hood</b>         |                                          |                    |                                       |                    |                                    |                    |                                           |                    |
| Exhaust                   | 1.18 (0.0494–201)/<br>2.40 (0.131–79.1)  | 8/<br><b>0.49</b>  | 499 (98.3–15900)/<br>827 (54.4–39100) | 5/<br><b>0.60</b>  | 0.478 (0–10.4)/<br>0.160 (0–14.0)  | 8/<br><b>2.99</b>  | 6.73 (6.48–<br>13.6)/<br>7.19 (5.21–9.60) | 5/<br>0.94         |
| Recirculating             | 1.31 (0.0989–160)/<br>1.27 (0.0848–78.7) | 12/<br><b>1.03</b> | 495 (82.2–12100)/<br>695 (97.0–16200) | 10/<br><b>0.71</b> | 0.427 (0–7.33)/<br>0.0628 (0–14.9) | 12/<br><b>6.80</b> | 8.96 (5.04–<br>26.8)/<br>8.51 (4.48–11.6) | 10/<br>1.05        |
| Absent                    | 1.85 (0–203)/<br>1.75 (0.265–53.1)       | 6/<br><b>1.06</b>  | 713 (98.9–14300)/<br>904 (58.0–17800) | 4/<br><b>0.79</b>  | 0.616 (0–28.2)/<br>0.231 (0–7.88)  | 7/<br><b>2.67</b>  | 10.9 (3.58–<br>13.4)/<br>9.88 (5.56–20.6) | 4/<br>1.10         |
| p-values:                 |                                          | <0.01              |                                       | <0.01              |                                    | <0.01              |                                           | 0.18               |

\* NO<sub>2</sub> concentrations were TWA measurements, all other pollutants were time resolved (one-minute resolution).

<sup>a</sup> BG = Built Green; <sup>b</sup> EER = Energy Efficiency Retrofitted; <sup>c</sup> Non-EER = Non-Energy Efficiency Retrofitted (conventional homes as a control group).

<sup>†</sup>I/O ratios that showed statistical significance (K-W test) in the mean differences (p<0.05) are shown in bold.

**Table 4.** Pollutant concentrations indoors and outdoors from filtered datasets with the corresponding p-values from K-W test on I/O ratios between categories.

|                               | Concentrations: Indoor Median (Indoor Range) / Outdoor Median (Outdoor Range) |                    |                                      |                    |                                     |                    |                                       |                   |
|-------------------------------|-------------------------------------------------------------------------------|--------------------|--------------------------------------|--------------------|-------------------------------------|--------------------|---------------------------------------|-------------------|
|                               | PN <sub>0.5-2.5</sub> [# /cm <sup>3</sup> ]                                   | n/ (I/O)           | BC [ng/m <sup>3</sup> ]              | n/ (I/O)           | CO [ppm]                            | n/ (I/O)           | NO <sub>2</sub> [ppb]*                | n/ (I/O)          |
| <b>Location</b>               |                                                                               |                    |                                      |                    |                                     |                    |                                       |                   |
| Aurora                        | 2.54 (0.680–26.2)/<br>6.13 (0.780–165)                                        | 4/<br><b>0.41</b>  | 386 (109–3490)/<br>739 (54.5–39100)  | 4/<br><b>0.52</b>  | 0.790 (0–2.95)/<br>0.185 (0–1.75)   | 4/<br><b>4.27</b>  | 6.53 (6.39–10.1)/<br>9.23 (4.48–9.24) | 3/<br>0.71        |
| Boulder/<br>Longmont          | 2.88 (0.280–44.8)/<br>3.42 (0.240–111)                                        | 7/<br><b>0.84</b>  | 409 (82.3–4460)/<br>657 (122–11000)  | 4/<br><b>0.62</b>  | 0.458 (0–10.5)/<br>0.156 (0–14.0)   | 9/<br><b>2.94</b>  | 5.76 (3.58–6.73)/<br>9.59 (5.21–7.19) | 4/<br>0.60        |
| West Denver                   | 3.35 (0.140–563)/<br>5.06 (0.450–224)                                         | 11/<br><b>0.66</b> | 664 (119–4700)/<br>787 (57.9–16300)  | 8/<br><b>0.84</b>  | 0.537 (0–5.3)/<br>0.274 (0–3.45)    | 11/<br><b>1.96</b> | 10.8 (8.00–13.8)/<br>9.89 (6.55–11.1) | 6/<br>1.1         |
| Central/<br>North Denver      | 5.20 (0.790–34.8)/<br>7.14 (0.780–101)                                        | 4/<br><b>0.73</b>  | 599 (83.3–5080)/<br>943 (128–17800)  | 3/<br><b>0.64</b>  | 0.73 (0–2.18)/<br>0.279 (0–2.80)    | 3/<br><b>2.62</b>  | 9.30 (8.62–13.4)/<br>9.55 (7.78–20.6) | 3/<br>0.97        |
| p-values:                     | <0.01                                                                         |                    | <0.01                                |                    | <0.01                               |                    | 0.33                                  |                   |
| <b>Building Type</b>          |                                                                               |                    |                                      |                    |                                     |                    |                                       |                   |
| BG <sup>a</sup>               | 2.99 (0.280–44.8)/<br>2.92 (0.240–111)                                        | 5/<br><b>1.02</b>  | 434 (98.3–1300)/<br>564 (176–3180)   | 1/<br><b>0.77</b>  | 0.335 (0–4.46)/<br>0.085 (0–4.10)   | 5/<br><b>3.94</b>  | 6.73 (6.73–6.73)/<br>5.21 (5.21–5.21) | 1/<br>1.29        |
| EER <sup>b</sup>              | 2.56 (0.140–563)/<br>4.49 (0.450–224)                                         | 11/<br><b>0.57</b> | 381 (82.3–3490)/<br>633 (54.5–39100) | 10/<br><b>0.60</b> | 0.573 (0–10.5)/<br>0.242 (0–14.0)   | 13/<br><b>2.37</b> | 8.00 (3.58–11.9)/<br>6.95 (4.48–9.58) | 9/<br>1.15        |
| Non-EER <sup>c</sup>          | 5.96 (0.280–52.4)/<br>9.08 (0.780–168)                                        | 10/<br><b>0.66</b> | 792 (83.3–5080)/<br>956 (128–21500)  | 8/<br><b>0.83</b>  | 0.691 (0–2.95)/<br>0.248 (3.45)     | 9/<br><b>2.79</b>  | 10.8 (6.48–13.8)/<br>9.89 (7.19–20.6) | 6/<br>1.09        |
| p-values:                     | <0.01                                                                         |                    | <0.01                                |                    | <0.01                               |                    | 0.34                                  |                   |
| <b>Road Proximity</b>         |                                                                               |                    |                                      |                    |                                     |                    |                                       |                   |
| <100 m                        | 1.540 (0.198–15.8)/<br>2.57 (0.194–29.2)                                      | 15/<br><b>0.60</b> | 642 (83.3–5080)/<br>870 (54.5–39100) | 12/<br><b>0.74</b> | 0.524 (0–4.46)/<br>0.129 (0–4.10)   | 15/<br><b>4.06</b> | 10.1 (6.53–13.8)/<br>9.58 (5.21–20.6) | 9/<br><b>1.05</b> |
| 100–200 m                     | 0.685 (0.050–7.97)/<br>1.71 (0.159–79.1)                                      | 5/<br><b>0.40</b>  | 388 (82.3–4460)/<br>614 (97.0–11000) | 7/<br><b>0.63</b>  | 0.621 (0–2.75)/<br>0.251 (0–3.01)   | 7/<br><b>2.47</b>  | 6.48 (3.58–8.62)/<br>6.55 (4.48–7.78) | 7/<br><b>0.99</b> |
| >200 m                        | 1.09 (0.10–198)/<br>1.27 (0.085–22.4)                                         | 6/<br><b>0.85</b>  | -<br>-                               | 0/<br>-            | 0.222 (0–10.5)/<br>0 (0–14.0)       | 5/<br>-            | -<br>-                                | 0/<br>-           |
| p-values:                     | <0.01                                                                         |                    | <0.01                                |                    | <0.01                               |                    |                                       |                   |
| <b>Wildfire Plume Density</b> |                                                                               |                    |                                      |                    |                                     |                    |                                       |                   |
| None                          | 2.15 (0.140–44.8)/<br>3.36 (0.240–224)                                        | 7/<br><b>0.64</b>  | 422 (82.3–3490)/<br>590 (98.3–6900)  | 5/<br><b>0.72</b>  | 0.526 (0–3.23)/<br>0.224 (0–4.10)   | 9/<br><b>2.35</b>  | 6.39 (3.58–10.1)/<br>5.56 (4.48–9.24) | 5/<br>1.14        |
| Low                           | 3.25 (0.280–52.4)/<br>4.81 (0.650–58.3)                                       | 7/<br><b>0.68</b>  | 568 (144–4700)/<br>745 (97.0–8280)   | 3/<br><b>0.80</b>  | 0.605 (0–10.5) /<br>0.206 (0–14.0)  | 7/<br><b>2.94</b>  | 11.8 (8.00–13.8)/<br>9.60 (6.55–11.1) | 3/<br>1.22        |
| Medium                        | 6.42 (0.710–563)/<br>7.49 (0.750–168)                                         | 9/<br><b>0.86</b>  | 632 (83.3–5080)/<br>857 (54.5–39100) | 8/<br><b>0.74</b>  | 0.528 (0–5.30)/<br>0.253 (0–1.90)   | 8/<br><b>2.09</b>  | 8.96 (6.48–11.9)/<br>9.39 (7.19–10.2) | 6/<br>0.96        |
| High                          | 9.85 (4.08–30.4)/<br>24.9 (8.44–165)                                          | 3/<br><b>0.40</b>  | 495 (98.3–4320)/<br>948 (176–21500)  | 3/<br><b>0.52</b>  | 0.88 (0.26–4.46)/<br>0.278 (0–2.80) | 3/<br><b>3.17</b>  | 10.1 (6.73–13.4)/<br>12.9 (5.21–20.6) | 2/<br>0.78        |
| p-values:                     | <0.01                                                                         |                    | <0.01                                |                    | <0.01                               |                    | 0.46                                  |                   |
| <b>Mechanical Ventilation</b> |                                                                               |                    |                                      |                    |                                     |                    |                                       |                   |
| Present                       | 2.95 (0.560–44.8)/                                                            | 4/                 | 448 (98.3–2290)/                     | 3/                 | 0.442 (0–4.46)/                     | 5/                 | 6.73 (3.58–8.06)/                     | 3/                |

|                    |                    |             |                  |             |                    |             |                   |      |
|--------------------|--------------------|-------------|------------------|-------------|--------------------|-------------|-------------------|------|
|                    | 3.71 (0.550–111)   | <b>0.80</b> | 622 (98.3–6290)  | <b>0.72</b> | 0.180 (0–4.10)     | <b>2.46</b> | 5.56 (5.21–6.95)  | 1.21 |
| Absent             | 3.43 (0.140–563)/  | 22/         | 541 (82.3–5080)/ | 16/         | 0.602 (0–10.5)/    | 22/         | 9.30 (5.04–13.8)/ | 13/  |
|                    | 5.03 (0.240–224)   | <b>0.68</b> | 787 (54.5–39100) | <b>0.69</b> | 0.237 (0–1.40)     | <b>2.54</b> | 9.24 (4.48–20.6)  | 1.01 |
| p-values:          | <0.01              |             | <0.01            |             | <0.01              |             | 0.94              |      |
| Hours Windows Open |                    |             |                  |             |                    |             |                   |      |
| 0                  | 1.13 (0.314–6.71)/ | 3/          | 219 (98.9–924)/  | 2/          | 0.385 (0–3.23)/    | 3/          | 5.05 (3.58–6.53)/ | 2/   |
|                    | 2.44 (0.194–54.0)  | <b>0.46</b> | 784 (54.5–39100) | <b>0.28</b> | 0.0582 (0–2.89)    | <b>6.61</b> | 7.39 (5.56–9.23)  | 0.68 |
| 1–6                | 0.544 (0–4.31)/    | 4/          | 317 (82.2–2120)/ | 4/          | 0.692 (0–2.75)/    | 4/          | 7.19 (5.04–8.62)/ | 4/   |
|                    | 1.49 (0.160–79.1)  | <b>0.36</b> | 540 (97–6950)    | <b>0.59</b> | 0.258 (0–3.01)     | <b>2.68</b> | 6.01 (4.48–7.78)  | 1.20 |
| 7–12               | 0.932 (0.10–15.8)/ | 5/          | 406 (109–3000)/  | 2/          | 0.301 (0–10.4)/    | 5/          | -                 | 0    |
|                    | 1.48 (0.085–58.1)  | <b>0.63</b> | 800 (119–21500)  | <b>0.51</b> | 0 (0–14.0)         | -           | -                 | -    |
| >12                | 1.50 (0.10–199)/   | 14/         | 739 (83.3–5100)  | 11/         | 0.448 (0–5.30)/    | 15/         | 9.98 (6.48–13.8)/ | 10/  |
|                    | 1.78 (0.120–59.2)  | <b>0.84</b> | 857 (58–17700)   | <b>0.86</b> | 0.175 (0–3.45)     | <b>2.56</b> | 9.56 (5.21–9.23)  | 1.05 |
| p-values:          | <0.01              |             | <0.01            |             | <0.01              |             | 0.11              |      |
| Gas Stove          |                    |             |                  |             |                    |             |                   |      |
| Present            | 1.47 (0.100–18.5)/ | 5/          | 597 (109–4400)/  | 3/          | 0.672 (0.08–2.95)/ | 4/          | -                 | -    |
|                    | 2.02 (0.275–59.2)  | <b>0.73</b> | 858 (119–21500)  | <b>0.70</b> | 0.147 (0–1.13)     | <b>4.57</b> | -                 | -    |
| Absent             | 1.11 (0.050–199)/  | 21/         | 503 (82.3–5080)/ | 16/         | 0.420 (0–10.4)/    | 23/         | 8.34 (3.58–13.8)/ | 16/  |
|                    | 1.60 (0.085–79.1)  | <b>0.69</b> | 745 (54.5–39100) | <b>0.67</b> | 0.144 (0–14.0)     | <b>2.92</b> | 8.51 (4.48–20.6)  | -    |
| p-values:          | <0.01              |             | <0.01            |             | <0.01              |             |                   |      |
| Stove Hood Type    |                    |             |                  |             |                    |             |                   |      |
| Exhaust            | 0.978 (0.05–9.24)/ | 8/          | 479 (98.3–4460)/ | 5/          | 0.473 (0–10.4)/    | 8/          | 6.63 (6.48–11.8)/ | 4/   |
|                    | 2.39 (0.160–79.1)  | <b>0.41</b> | 829 (54.4–39100) | <b>0.58</b> | 0.159 (0–14.0)     | <b>2.97</b> | 8.21 (5.21–9.60)  | 0.81 |
| Recirculating      | 1.04 (0.10–15.8)/  | 12/         | 490 (82.3–5080)/ | 10/         | 0.389 (0–2.75)/    | 12/         | 8.34 (5.04–13.8)/ | 8/   |
|                    | 1.24 (0.085–59.2)  | <b>0.81</b> | 693 (97.0–16200) | <b>0.71</b> | 0.050 (0–4.10)     | <b>7.78</b> | 7.37 (4.48–11.1)  | 1.13 |
| Absent             | 1.62 (0.10–199)/   | 6/          | 685 (99.0–4320)/ | 4/          | 0.592 (0–5.30)/    | 7/          | 10.9 (3.58–13.4)/ | 4/   |
|                    | 1.76 (0.264–53.1)  | <b>0.92</b> | 908 (57.9–17700) | <b>0.75</b> | 0.258 (0–2.80)     | <b>2.29</b> | 9.88 (5.56–20.6)  | 1.10 |
| p-values:          | <0.01              |             | <0.01            |             | <0.01              |             | 0.30              |      |

\* NO<sub>2</sub> concentrations were TWA measurements, all other pollutants were time resolved (one-minute resolution). Data from homes with gas stoves were not included in the filtered dataset.

<sup>a</sup> BG = Built Green; <sup>b</sup> EER = Energy Efficiency Retrofitted; <sup>c</sup> Non-EER = Non-Energy Efficiency Retrofitted (conventional homes as a control group).

I/O ratios that showed statistical significance (K-W test) in the mean differences (p<0.05) are shown in bold.
